# Supplementary material
Source: PubMed Central journal article supplement (PMC4452395)
Supplement: NIHMS655534-supplement-supplement_1.pdf [file NIHMS655534-supplement-supplement_1.pdf]

Supplemental Table 1. Proportion of subjects with electrographic seizures and electrographic status epilepticus. Electrographic seizures occurred in 740 of 2247 subjects (33%) who underwent continuous EEG monitoring.

|                                           | (Jette, Claassen, Emerson, et al. 2006) | (Saengpatratchai, et al. 2006) | (Abend, Topjian, Lichord, et al. 2009)      | (Williams, Jarrar and Buchhalter 2011) | (McCoy, Sharma, Ochi, et al. 2011) | (Greiner, Holland, Leach, et al. 2012)                       | (Schreiber, Zelleke, Gaillard, et al. 2012) | (Shahwan, Bailey, Shekerdemian, et al. 2010) | (Gwer, et al. 2012) | (Kirkham, Wade, McElduff, et al. 2012) | (Arndt, Lerner, Matsumoto, et al. 2013) | (Piantino, Wainwright, Grimason, et al. 2013) | (Hasbani, et al. 2013)         | (Topjian, Gutierrez-Colina, Sanchez, et al. 2013) | (Abend, Arndt, Carpenter, et al. 2013) | (Payne, Zhao, Frndova, et al. 2014) | (Gold, Crawford, Glaser, et al. 2014)           |
|-------------------------------------------|-----------------------------------------|--------------------------------|---------------------------------------------|----------------------------------------|------------------------------------|--------------------------------------------------------------|---------------------------------------------|----------------------------------------------|---------------------|----------------------------------------|-----------------------------------------|-----------------------------------------------|--------------------------------|---------------------------------------------------|----------------------------------------|-------------------------------------|-------------------------------------------------|
| <b>Total with Electrographic Seizures</b> | 51                                      | 23                             | 9                                           | 47                                     | 39                                 | 12                                                           | 28                                          | 7                                            | 28                  | 74                                     | 37                                      | 4                                             | 12                             | 84                                                | 162                                    | 93                                  | 30                                              |
| <b>Total in Study</b>                     | 117                                     | 141                            | 19                                          | 122                                    | 121                                | 57                                                           | 94                                          | 100                                          | 82                  | 204                                    | 87                                      | 19                                            | 21                             | 200                                               | 550                                    | 259                                 | 54                                              |
| <b>Age Group</b>                          | Peds + Neo                              | Peds                           | Peds                                        | Peds + Neo                             | Peds + Neo                         | Peds                                                         | Peds                                        | Peds                                         | Peds                | Peds + Neo                             | Peds                                    | Peds                                          | Peds                           | Peds                                              | Peds                                   | Peds                                | Peds                                            |
| <b>Subject Location</b>                   | ICU                                     | ICU                            | ICU                                         | ICU                                    | ICU                                | ICU + Other                                                  | ICU                                         | ICU                                          | ICU                 | ICU                                    | ICU                                     | ICU                                           | ICU                            | ICU                                               | ICU                                    | ICU                                 | ICU + Other                                     |
| <b>Notes</b>                              |                                         |                                | Cardiac arrest with therapeutic hypothermia |                                        |                                    | Used portion of data presented in Patient Distribution Table |                                             |                                              |                     | 2 Centers                              | Traumatic Brain Injury                  | ECMO                                          | Abusive Traumatic Brain Injury |                                                   | Multi-center study                     |                                     | Encephalitis<br>Used data for portion with cEEG |

Supplemental Table 2. Proportion of subjects with electrographic seizures identified in 1 hour, 24 hours, and 48 hours.

|                                        | Reference                               |                         |                                                 |                                          |                                                                      |                                        |                                                               |                                             |                                              | SUM | Proportion of 268 subjects with electrographic seizures identified by each EEG monitoring duration |
|----------------------------------------|-----------------------------------------|-------------------------|-------------------------------------------------|------------------------------------------|----------------------------------------------------------------------|----------------------------------------|---------------------------------------------------------------|---------------------------------------------|----------------------------------------------|-----|----------------------------------------------------------------------------------------------------|
|                                        | (Jette, Claassen, Emerson, et al. 2006) | (Abend and Dlugos 2007) | (Abend, Gutierrez-Colina, Topjian, et al. 2011) | (Williams, Jarrar and Buchhalter 2011)   | (McCoy, Sharma, Ochi, et al. 2011)                                   | (Greiner, Holland, Leach, et al. 2012) | (Schreiber, Zelleke, Gaillard, et al. 2012)                   | (Shahwan, Bailey, Shekerdeman, et al. 2010) | (Piantino, Wainwright, Grimson, et al. 2013) |     |                                                                                                    |
| <b>Seizures Identified by 1 hour</b>   | 26                                      | 16                      | 24                                              | 29                                       | 11                                                                   | 25                                     | 12                                                            | 3                                           | 2                                            | 148 | 0.55                                                                                               |
| <b>Seizures Identified by 24 hours</b> | 41                                      | 19                      | 43                                              | 41                                       | 28                                                                   | 26                                     | 20                                                            | 7                                           | 4                                            | 229 | 0.85                                                                                               |
| <b>Seizures Identified by 48 hours</b> | 45                                      | 20                      | 45                                              | 43                                       | 28                                                                   | 26                                     | 20                                                            | 7                                           | 4                                            | 238 | 0.89                                                                                               |
| <b>Total with Seizures</b>             | 51                                      | 20                      | 46                                              | 47                                       | 39                                                                   | 26                                     | 28                                                            | 7                                           | 4                                            | 268 |                                                                                                    |
| <b>Notes</b>                           |                                         |                         |                                                 | Estimated number at 48 hours from graph. | Timing only reported for subjects with non-convulsive-only seizures. |                                        | Reported 30 min (not 1 hour) which are used as 1 hour values. |                                             |                                              |     |                                                                                                    |

Supplemental Table 3. Pediatric Neurologist Costs

| <b>Level</b> | <b>Average Yearly Compensation*</b> | <b>Average Yearly Compensation plus Benefits**</b> | <b>Average Hourly Cost***</b> |
|--------------|-------------------------------------|----------------------------------------------------|-------------------------------|
| 25%          | \$166,500                           | \$216,450                                          | \$112.73                      |
| Median       | \$185,500                           | \$241,150                                          | \$125.60                      |
| 75%          | \$209,000                           | \$271,700                                          | \$142.00                      |

\*Average yearly salary crated by average of the instructor, assistant professor, associate professor, and professor salary levels.  
 \*\* 30% benefits added to compensation.  
 \*\*\*Hourly cost calculated based on 1920 hours per year (40 hours per week for 48 weeks).

Supplemental Table 4. EEG Technologist Costs

| <b>Level</b> | <b>Average Yearly Compensation</b> | <b>Average Yearly Compensation plus Benefits*</b> | <b>Average Hourly Cost **</b> | <b>Average Hourly Cost Converted to 2013 dollars</b> |
|--------------|------------------------------------|---------------------------------------------------|-------------------------------|------------------------------------------------------|
| 25%          | \$42,853                           | \$55,708.90                                       | \$29.02                       | \$28.42                                              |
| Median       | \$48,235                           | \$62,705.50                                       | \$32.66                       | \$32.02                                              |
| 75%          | \$53,799                           | \$69,938.70                                       | \$36.43                       | \$35.68                                              |

\*\* 30% benefits added to compensation.  
 \*\*\*Hourly cost calculated based on 1920 hours per year (40 hours per week for 48 weeks).

Supplemental Table 5. Electrode Cost Strategies

| <b>Cost Strategy</b>    | <b>Medium</b> | <b>Low</b> | <b>High</b> |
|-------------------------|---------------|------------|-------------|
| Electrode Cost          | \$200         | \$150      | \$250       |
| Uses (days)             | 365           | 548        | 183         |
| Calculated Cost per Use | \$0.55        | \$0.27     | \$1.37      |

Supplemental Table 6. EEG Machine Cost Strategies

| <b>Cost Strategy</b>                                                                                    | <b>Medium</b> | <b>Low</b> | <b>High</b> |
|---------------------------------------------------------------------------------------------------------|---------------|------------|-------------|
| EEG Machine Cost                                                                                        | \$40,000      | \$30,000   | \$50,000    |
| Years Used                                                                                              | 8             | 10         | 6           |
| Days per Year Used                                                                                      | 208           | 260        | 156         |
| Calculated Cost per Continuous EEG Monitoring Day (24 or 48 hour strategies)                            | \$24.04       | \$11.54    | \$53.42     |
| EEG Studies per Day *                                                                                   | 6             | 8          | 4           |
| Calculated Cost per EEG Study (1 hour strategy) *                                                       | \$4.01        | \$1.80     | \$10.02     |
| *Included only for 1 hour EEG studies since a machine would often be used for multiple studies per day. |               |            |             |
